# Supplementary material for: Growth of 2,2‐Biimidazole‐Based Nanorods on Mica Substrate
Source: Hindawi journal article supplement (doi:10.1155/2010/706920), 2010-01-01
Supplement: f2 [file 706920.f2.pdf]

## Supporting Information

### Growth of 2,2-biimidazole based Nanorods on Mica Substrate

**Figure S1**

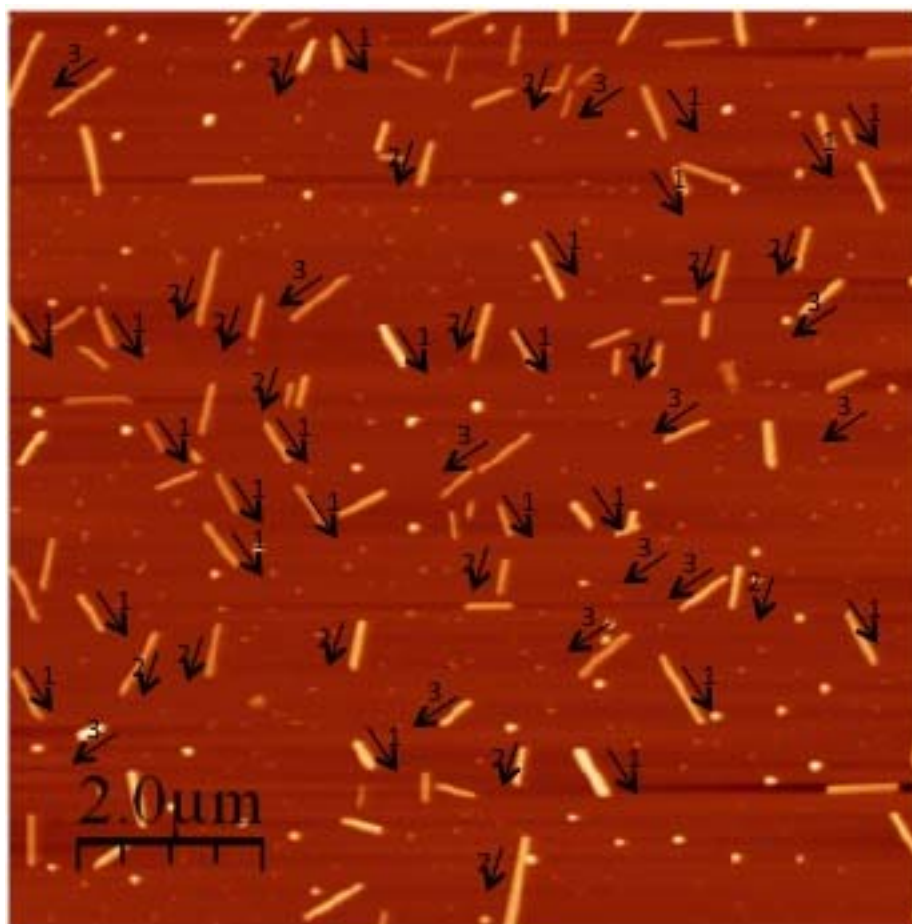

**Figure S1.** AFM topography image showing the orientation of the nanorods. The nanorods are oriented in three preponderant direction marked by 1,2,and 3.

**Figure S2**

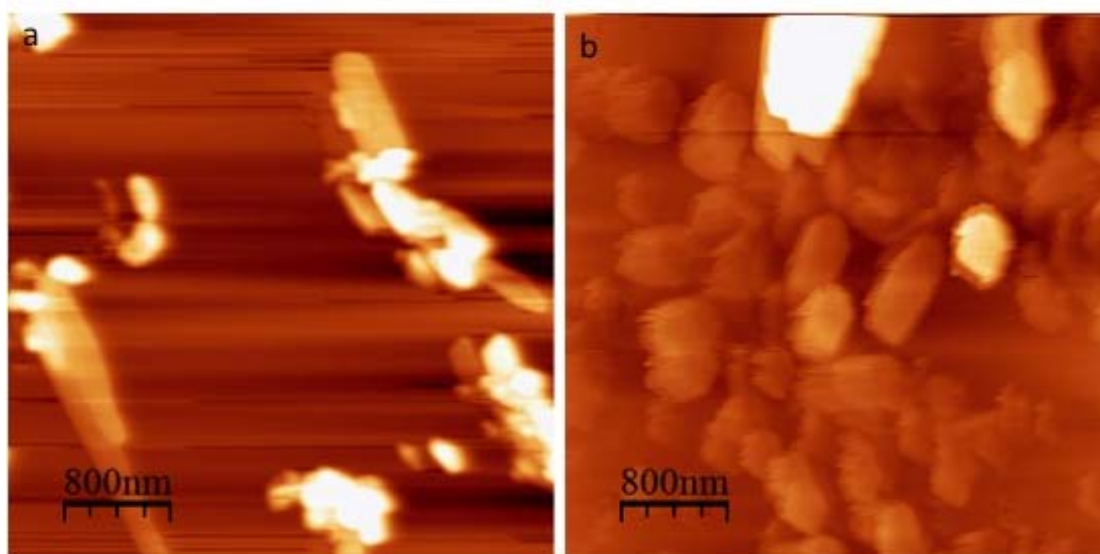

**Figure S2.** AFM topography images of non-homogeneous three dimensional aggregates on annealed Mica (a) and Silicon dioxide (b). No nanorods are observed.

**Figure S3**

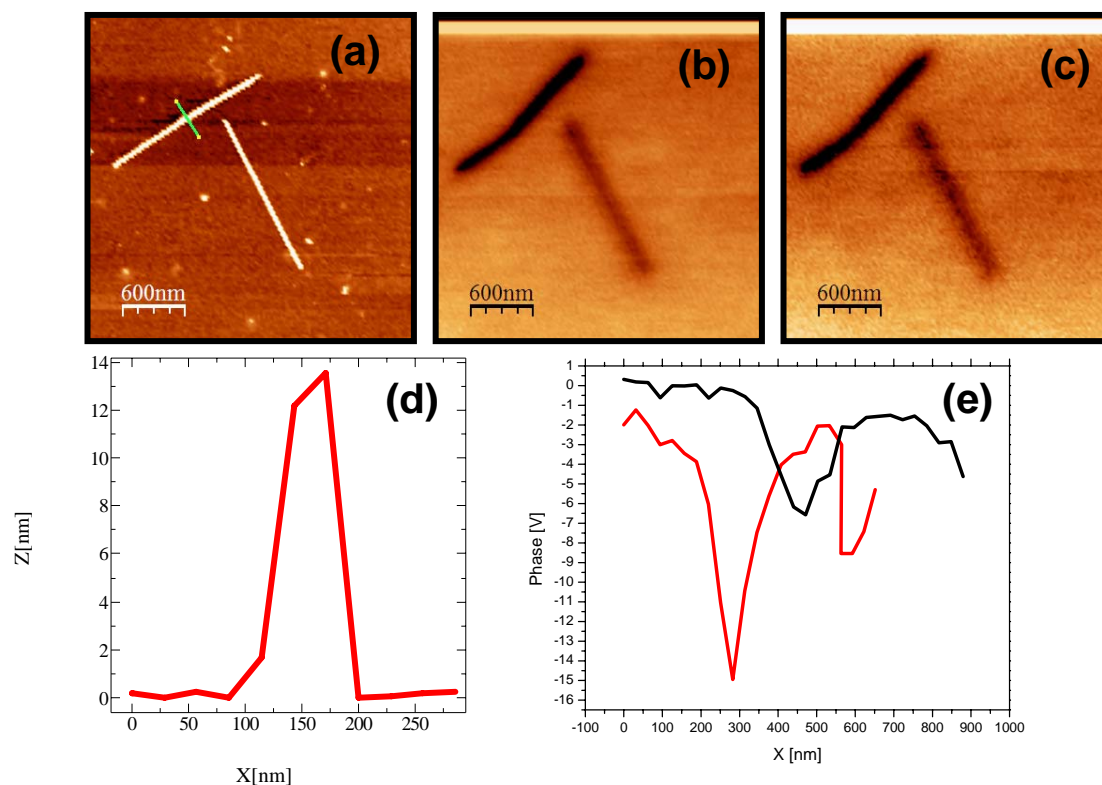

**Figure S3:** AFM and EFM imaging of CNT with (a) Topography of CNT (b) EFM imaging with a +5 V bias applied to the tip. (c) EFM imaging with -5 V bias applied to the tip (d) Diagram showing the cross section for height measurement. (e) Cross sections showing the intensity of the EFM signal through phase imaging in volts for CNT molecules shown in (b) and (c).
